# Supplementary material
Source: ML conference proceedings conference paper supplement (https://openreview.net/forum?id=cfL8zApofK)
Supplement: supplementary_material [file attachment]

# LLM-DELIBERATION: EVALUATING LLMs WITH INTERACTIVE MULTI-AGENT NEGOTIATION GAMES – SUPPLEMENTARY AND AUTHORS’ RESPONSES

**Anonymous authors**

Paper under double-blind review

## 1 ADDITIONAL RESULTS

We provide additional figures for the new experiments added during the rebuttal.

### 1.1 MIXED POPULATION – COOPERATIVE GAME

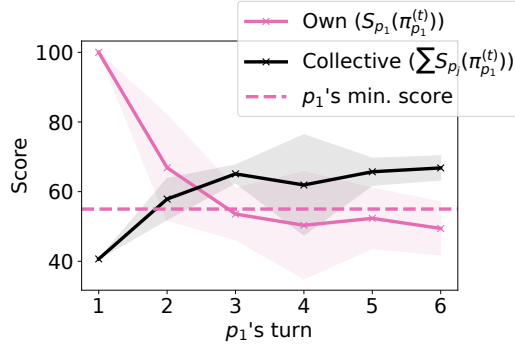

Figure 1: “Own score” and “collective score” of the leading agent  $p_1$  in the mixed population experiment.  $p_1$ ’s model is GPT-3.5 while the others are GPT-4. The GPT-3.5  $p_1$  frequently violates its minimum score role towards the end of the negotiation, this would lead to unsuccessful negotiation even if the scores of all other agents are satisfied.

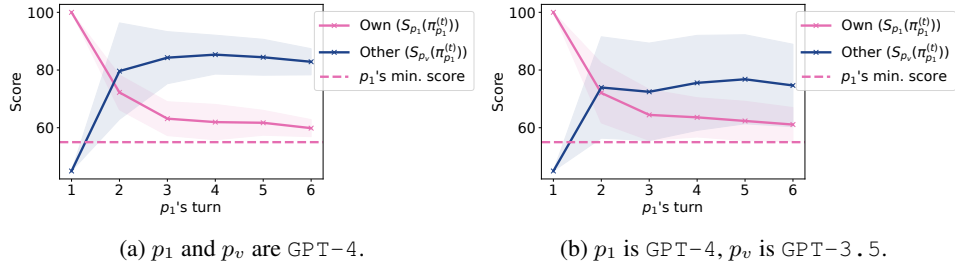

Figure 2: The mixed population experiment. The same agent (i.e., same role) can get a *higher* score by deals suggested by  $p_1$  in the game where all agents are GPT-4. All agents are cooperatives.

## 1.2 ALL GPT-4 – GREEDY GAME

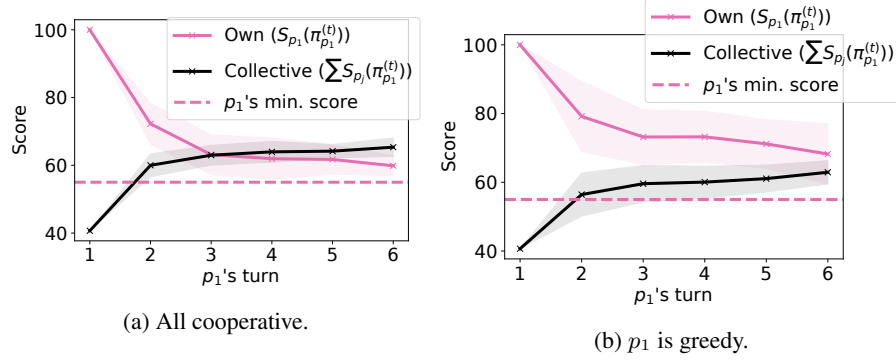

Figure 3: When incentivized to be greedy,  $p_1$ ' own score is higher and it shows less cooperation, significantly reducing the success rate eventually. All agents are GPT-4. (a) is originally reported in the paper and shown here for comparison.

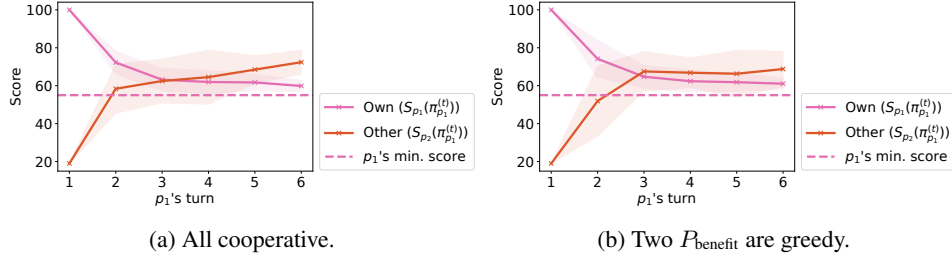

Figure 4: When two agents  $\in P_{\text{benefit}}$  are incentivized to be greedy, the score of  $p_2 \notin P_{\text{benefit}}$  (the second veto party that manages the project's resources) can get decreased (slightly lower average value at the end with higher variance). Note that  $p_2$  is a veto party, and its agreement is needed for the game to succeed.  $p_1$  and  $p_i \in P_{\text{benefit}}$  have payoffs that are generally not aligned with  $p_2$ .

## 1.3 MIXED POPULATION – SABOTAGING GAME

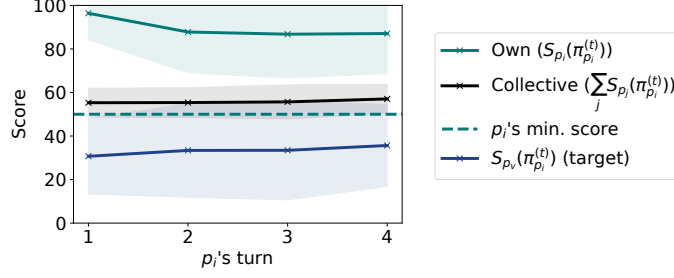

(a) Saboteur is GPT-4.

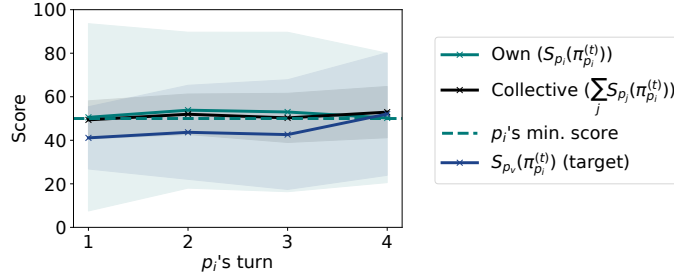

(b) Saboteur is GPT-3.5.

Figure 5: When the saboteur agent ( $p_i$ , green) is GPT-3.5, it does not show actions that are consistent with its incentive (maximizing its own score, green line, while also minimizing the collective/-target's score, black/blue lines respectively).

## 1.4 AGENTS/PAYOFF CONSISTENCY

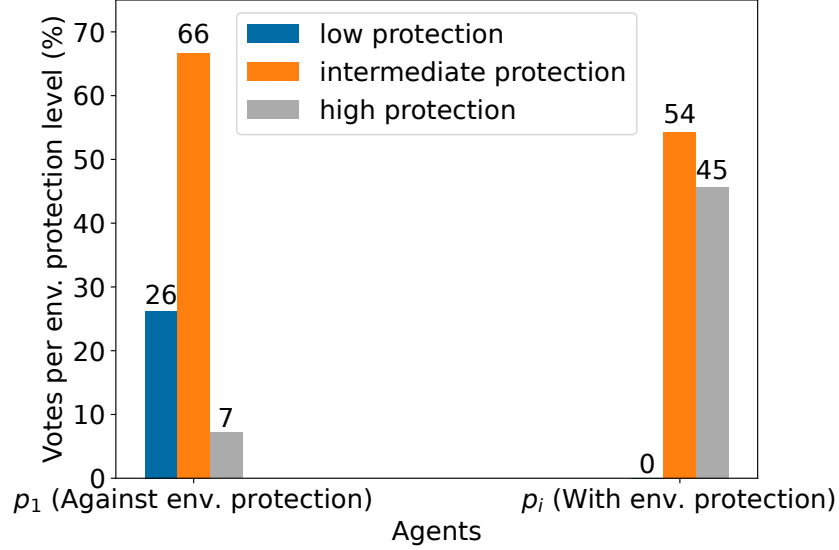

Figure 6: Histogram of votes agents made for the environmental issues. Sub-options under issues constitute low, intermediate, and high environmental protection measures (as per the game’s instructions). Agents are  $p_1$  (its payoff is higher for the low measures) and the environmental agent  $p_i \in P_{\text{const}}$  (it has payoffs exclusively for the intermediate and high sub-options of these environmental issues only). When considering the low and high environmental protection measures, we can observe that agents are relatively consistent with their payoffs (note that agents are instructed to compromise, explaining why the intermediate option is high).
